# Supplementary material for: VitalOne™: a point-of-care platform for rapid, comprehensive, central-lab quality blood testing
Source: Royal Society of Chemistry journal article supplement (doi:10.1039/d4sd00105b), 2024-01-01
Supplement: d4sd00105b1.pdf [file d4sd00105b1.pdf]

## VitalOne™: A point-of-care platform for rapid, comprehensive, central-lab quality blood testing

### Electronic supplementary information

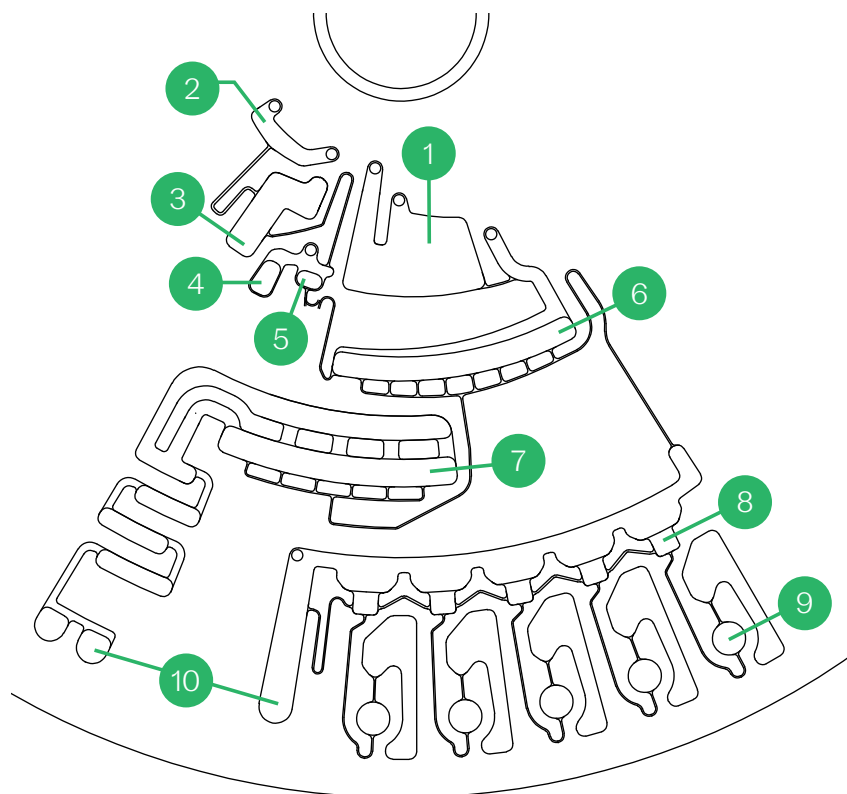

1R clinical chemistry disc schematic. Annotated structures: (1) Dilution buffer inlet chamber; (2) sample inlet chamber; (3) sample plasma separation chamber; (4) sample overflow chamber; (5) sample metering chamber; (6) dilution mixing chamber; (7) dilution ballast chamber; (8) diluted sample aliquot chamber; (9) reaction chamber (contains 1R reagent lysosphere); (10) overflow chambers.
